# Supplementary material
Source: PubMed Central journal article supplement (PMC8117519)
Supplement: JB.00058-21-s0001.pdf [file JB.00058-21-s0001.pdf]

**Supplementary Materials to**  
**Non-essential ribosomal proteins in bacteria and archaea identified using**  
**COGs**

**by M. Y. Galperin, Y. I. Wolf, S. K. Garushyants, R. Vera Alvarez, and E. V. Koonin**

**Supplementary Figures**

**Figure S1. Organization of the *spc* operon in bacteria with tiny genomes.**

**Supplementary Tables**

**Table S1. Core bacterial and archaeal ribosomal proteins.** The table shows the RP gene names, corresponding entries in the COG and Pfam (1) databases, their universal nomenclature from Ban *et al.*, 2014 (2), phylogenetic distribution, and the UniProt (3) accession numbers in *Escherichia coli*, *Bacillus subtilis*, *Mycoplasma pneumoniae*, *Aeropyrum pernix*, *Haloarcula marismortui* and *Saccharomyces cerevisiae*.

**Table S2. Frameshifted ribosomal proteins in the genomes covered by the COG database**

**Table S3. Unannotated ORFs coding for ribosomal proteins in the genomes covered by the COG database**

**Table S4. Experimental data on large-scale inactivation of ribosomal proteins**

**Table S5. Loss of ribosomal proteins that differ in their rRNA interactions and the order of assembly**

***Escherichia coli***

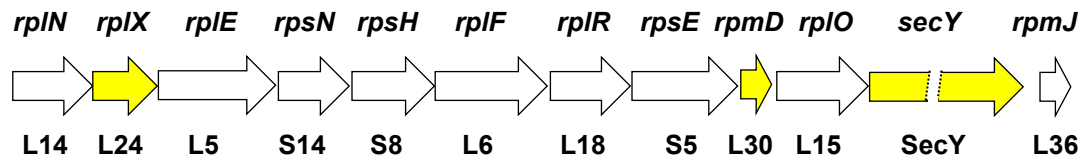

***Ca. Nasuia deltocephalinicola***

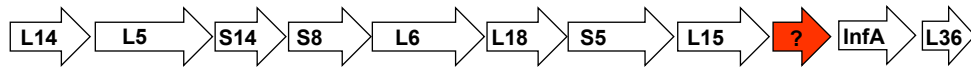

***Ca. Vidania fulgoroideae* OLIH**

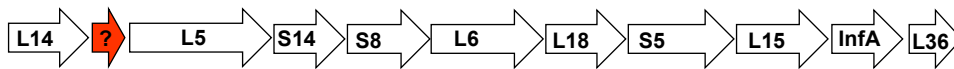

***Ca. Hodgkinia cicadicola* Dsem**

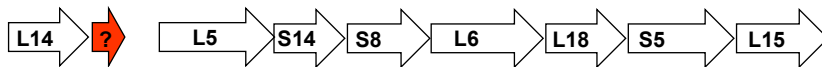

***Ca. Tremblaya phenacola* PAVE**

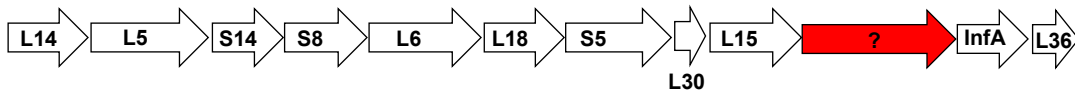

***Ca. Carsonella ruddii* DC**

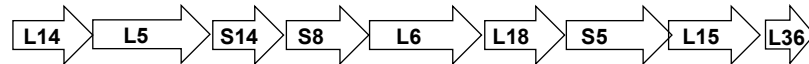

***Ca. Sulcia muelleri* PUNC**

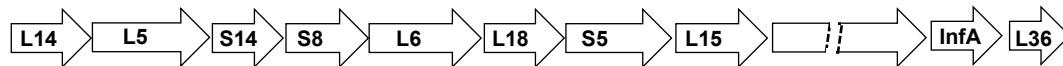

***Ca. Zinderia insecticola* CARI**

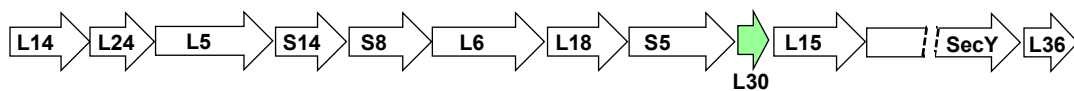

**Figure S1. Organization of the *spc* operon in bacteria with tiny genomes.**

The top row shows the *spc* operon organization in *E. coli* (4), which is widely conserved among various bacteria and archaea (5). The *rplX*, *rpmD* and *secY* genes, which are lost in some of the tiny genomes, are indicated by yellow shading. The *secY* gene, coding for a ~440-aa protein, is not drawn to scale. Red arrows indicate ORFs with no discernible similarity to any known proteins, the diverged but recognizable *rpmD* gene of “*Ca. Zinderia insecticola*” is shown in green.

**Table S1. Core bacterial and archaeal ribosomal proteins, their gene names, corresponding entries in the COG and Pfam databases, their universal nomenclature, phylogenetic distribution, and the UniProt entries in *Escherichia coli*, *Bacillus subtilis*, *Mycoplasma pneumoniae*, *Aeropyrum pernix*, *Haloarcula marismortui* and *Saccharomyces cerevisiae*<sup>a</sup>.**

| Protein name       | Gene name   | COG number <sup>b</sup> | Pfam entry <sup>b</sup> | Ban, 2014 <sup>c</sup> name | Distribution <sup>d</sup> |     | UniProt accession number <sup>e</sup> |                          |                   |                  |        |
|--------------------|-------------|-------------------------|-------------------------|-----------------------------|---------------------------|-----|---------------------------------------|--------------------------|-------------------|------------------|--------|
|                    |             |                         |                         |                             | Ban, 2014 <sup>d</sup>    | COG | <i>E. coli</i>                        | <i>Bacillus subtilis</i> | <i>Haloarcula</i> | <i>Aeropyrum</i> | Yeast  |
| <b>50S subunit</b> |             |                         |                         |                             |                           |     |                                       |                          |                   |                  |        |
| L1                 | <i>rplA</i> | COG0081                 | PF00687                 | uL1                         | BAE                       | A+B | P0A7L0                                | Q06797                   | P12738            | Q9Y9W6           | POCX44 |
| L2                 | <i>rplB</i> | COG0090                 | PF00181+<br>PF03947     | uL2                         | BAE                       | A+B | P60422                                | P42919                   | P20276            | Q9YFN1           | POCX45 |
| L3                 | <i>rplC</i> | COG0087                 | PF00297                 | uL3                         | BAE                       | A+B | P60438                                | P42920                   | P20279            | Q9YFM2           | P14126 |
| L4                 | <i>rplD</i> | COG0088                 | PF00573                 | uL4                         | BAE                       | A+B | P60723                                | P42921                   | P12735            | Q9YFM1           | P10664 |
| L5                 | <i>rplE</i> | COG0094                 | PF00281                 | uL5                         | BAE                       | A+B | P62399                                | P12877                   | P14124            | Q9YF87           | POCOW9 |
| L6                 | <i>rplF</i> | COG0097                 | PF00347                 | uL6                         | BAE                       | A+B | P0AG55                                | P46898                   | P14135            | Q9YF91           | P05738 |
| L9                 | <i>rplI</i> | COG0359                 | PF03948                 | bL9                         | B                         | B   | P0A7R1                                | P37437                   | –                 | –                | –      |
| L10                | <i>rplJ</i> | COG0244                 | PF00466                 | uL10                        | BAE                       | A+B | P0A7J3                                | P42923                   | P15825            | Q9Y9W8           | P05317 |
| L11                | <i>rplK</i> | COG0080                 | PF03946+<br>PF00298     | uL11                        | BAE                       | A+B | P0A7J7                                | Q06796                   | P14122            | Q9Y9W5           | POCX53 |
| L7/L12             | <i>rplL</i> | COG0222                 | PF16320+<br>PF00542     | bL12                        | B                         | B   | P0A7K2                                | P02394                   | –                 | –                | –      |
| L13                | <i>rplM</i> | COG0102                 | PF00572                 | uL13                        | BAE                       | A+B | P0AA10                                | P70974                   | P29198            | Q9YB50           | P26784 |
| L14                | <i>rplN</i> | COG0093                 | PF00238                 | uL14                        | BAE                       | A+B | P0ADY3                                | P12875                   | P22450            | Q9YF82           | POCX41 |
| L15                | <i>rplO</i> | COG0200                 | PF00828                 | uL15                        | BAE                       | A+B | P02413                                | P19946                   | P12737            | Q9YF98           | P02406 |
| L16/<br>L10AE      | <i>rplP</i> | COG0197                 | PF00252                 | uL16                        | BAE                       | A+B | P0ADY7                                | P14577                   | P60617            | Q9YF95           | P41805 |
| L17                | <i>rplQ</i> | COG0203                 | PF01196                 | bL17                        | B                         | B   | P0AG44                                | P20277                   | –                 | –                | –      |
| L18                | <i>rplR</i> | COG0256                 | PF00861                 | uL18                        | BAE                       | A+B | P0C018                                | P46899                   | P14123            | Q9YF94           | P26321 |
| L19                | <i>rplS</i> | COG0335                 | PF01245                 | bL19                        | B                         | B   | P0A7K6                                | O31742                   | –                 | –                | –      |
| L20                | <i>rplT</i> | COG0292                 | PF00453                 | bL20                        | B                         | B   | P0A7L3                                | P55873                   | –                 | –                | –      |
| L21                | <i>rplU</i> | COG0261                 | PF00829                 | bL21                        | B                         | B   | P0AG48                                | P26908                   | –                 | –                | –      |
| L22                | <i>rplV</i> | COG0091                 | PF00237                 | uL22                        | BAE                       | A+B | P61175                                | P42060                   | P10970            | Q9YF76           | P05740 |
| L23                | <i>rplW</i> | COG0089                 | PF00276                 | uL23                        | BAE                       | A+B | P0ADZ0                                | P42924                   | P12732            | Q9YFM0           | P04456 |
| L24                | <i>rplX</i> | COG0198                 | PF00467                 | uL24                        | BAE                       | A+B | P60624                                | P0CI78                   | P10972            | Q9YF83           | P05743 |

|                    |             |         |                     |      |     |     |        |                |        |        |        |
|--------------------|-------------|---------|---------------------|------|-----|-----|--------|----------------|--------|--------|--------|
| L25                | <i>rplY</i> | COG1825 | PF01386             | bL25 | B   | B   | P68919 | AOA6M3Z<br>BP3 | –      | –      | –      |
| L27                | <i>rpmA</i> | COG0211 | PF01016             | bL27 | B   | B   | P0A7L8 | P05657         | –      | –      | –      |
| L28                | <i>rpmB</i> | COG0227 | PF00830             | bL28 | B   | B   | P0A7M2 | P37807         | –      | –      | –      |
| L29                | <i>rpmC</i> | COG0255 | PF00831             | uL29 | BAE | A+B | P0A7M6 | P12873         | P10971 | P58085 | P0CX84 |
| L30/L7E            | <i>rpmD</i> | COG1841 | PF00327             | uL30 | BAE | A+B | P0AG51 | P19947         | P14121 | Q9YF96 | P05737 |
| L31                | <i>rpmE</i> | COG0254 | PF01197             | bL31 | B   | B   | P0A7M9 | Q03223         | –      | –      | –      |
| L32                | <i>rpmF</i> | COG0333 | PF01783             | bL32 | B   | B   | P0A7N4 | O34687         | –      | –      | –      |
| L33                | <i>rpmG</i> | COG0267 | PF00471             | bL33 | B   | B   | P0A7N9 | P56849         | –      | –      | –      |
| L34                | <i>rpmH</i> | COG0230 | PF00468             | bL34 | B   | B   | P0A7P5 | P05647         | –      | –      | –      |
| L35                | <i>rpmI</i> | COG0291 | PF01632             | bL35 | B   | B   | P0A7Q1 | P55874         | –      | –      | –      |
| L36                | <i>rpmJ</i> | COG0257 | PF00444             | bL36 | B   | B   | P0A7Q6 | P20278         | –      | –      | –      |
| <b>30S subunit</b> |             |         |                     |      |     |     |        |                |        |        |        |
| S1                 | <i>rpsA</i> | COG0539 | PF00575             | bS1  | B   | B   | P0AG67 | P38494         | –      | –      | –      |
| S2                 | <i>rpsB</i> | COG0052 | PF00318             | uS2  | BAE | A+B | P0A7V0 | P21464         | P29202 | Q9YB45 | P32905 |
| S3                 | <i>rpsC</i> | COG0092 | PF07650+<br>PF00189 | uS3  | BAE | A+B | P0A7V3 | P21465         | P20281 | Q9YF78 | P05750 |
| S4                 | <i>rpsD</i> | COG0522 | PF00163+<br>PF01479 | uS4  | BAE | A+B | P0A7V8 | P21466         | Q00862 | Q9YB58 | O13516 |
| S5                 | <i>rpsE</i> | COG0098 | PF00333+<br>PF03719 | uS5  | BAE | A+B | P0A7W1 | P21467         | P26815 | Q9YF95 | P25443 |
| S6                 | <i>rpsF</i> | COG0360 | PF01250             | bS6  | B   | B   | P02358 | P21468         | –      | –      | –      |
| S7                 | <i>rpsG</i> | COG0049 | PF00177             | uS7  | BAE | A+B | P02359 | P21469         | P32552 | Q9YAU8 | P26783 |
| S8                 | <i>rpsH</i> | COG0096 | PF00410             | uS8  | BAE | A+B | P0A7W7 | P12879         | P12742 | Q9YF89 | P0C0W1 |
| S9                 | <i>rpsI</i> | COG0103 | PF00380             | uS9  | BAE | A+B | P0A7X3 | P21470         | P05763 | Q9YB48 | P0CX51 |
| S10                | <i>rpsJ</i> | COG0051 | PF00338             | uS10 | BAE | A+B | P0A7R5 | P21471         | P23357 | Q9YAV2 | P38701 |
| S11                | <i>rpsK</i> | COG0100 | PF00411             | uS11 | BAE | A+B | P0A7R9 | P04969         | P10788 | Q9YB55 | P06367 |
| S12                | <i>rpsL</i> | COG0048 | PF00164             | uS12 | BAE | A+B | P0A7S3 | P21472         | Q5UZR8 | Q9YAU5 | P0CX29 |
| S13                | <i>rpsM</i> | COG0099 | PF00416             | uS13 | BAE | A+B | P0A7S9 | P20282         | Q00861 | Q9YB60 | P0CX55 |
| S14                | <i>rpsN</i> | COG0199 | PF00253             | uS14 | BAE | A+B | P0AG59 | P12878         | P26816 | P58731 | P41057 |
| S15                | <i>rpsO</i> | COG0184 | PF00312             | uS15 | BAE | A+B | P0ADZ4 | P21473         | P05762 | Q9YCX3 | P05756 |
| S16                | <i>rpsP</i> | COG0228 | PF00886             | bS16 | B   | B   | P0A7T3 | P21474         | –      | –      | –      |
| S17                | <i>rpsQ</i> | COG0186 | PF00366             | uS17 | BAE | A+B | P0AG63 | P12874         | P12741 | Q9YF81 | P0CX47 |
| S18                | <i>rpsR</i> | COG0238 | PF01084             | bS18 | B   | B   | P0A7T7 | P21475         | –      | –      | –      |

|                                    |                           |         |         |       |     |     |        |        |        |        |        |
|------------------------------------|---------------------------|---------|---------|-------|-----|-----|--------|--------|--------|--------|--------|
| S19                                | <i>rpsS</i>               | COG0185 | PF00203 | uS19  | BAE | A+B | P0A7U3 | P21476 | P20284 | Q9YF74 | Q01855 |
| S20                                | <i>rpsT</i>               | COG0268 | PF01649 | bS20  | B   | B   | P0A7U7 | P21477 | –      | –      | –      |
| S21                                | <i>rpsU</i>               | COG0828 | PF01165 | bS21  | B   | B   | P68681 | P21478 | –      | –      | –      |
| <b>Archaeal ribosomal proteins</b> |                           |         |         |       |     |     |        |        |        |        |        |
| L7Ae                               | Rpl7Ae                    | COG1358 | PF01248 | eL8   | AE  | A+B | –      | P46350 | P12743 | Q9YAX7 | P48589 |
| L12E/<br>L44/L45<br>/RPP1/<br>RPP2 | RPP1A                     | COG2058 | PF00428 | P1/P2 | AE  | A   | –      | –      | P15772 | Q9Y9W9 | P05318 |
| L13E                               | RPL13                     | COG4352 | PF01294 | eL13  | AE  | A   | –      | –      | P29198 | Q9YEN9 | P40212 |
| L14E/L6<br>E/L27E                  | RPL14A                    | COG2163 | PF01777 | eL14  | AE  | A   | –      | –      | –      | Q9YDD7 | POC2H6 |
| L15E                               | RPL15A                    | COG1632 | PF00827 | eL15  | AE  | A   | –      | –      | P60618 | Q9YBZ8 | P05748 |
| L18E                               | RPL18A                    | COG1727 | PF17135 | eL18  | AE  | A   | –      | –      | P12733 | Q9YB51 | POCX49 |
| L19E                               | RPL19A                    | COG2147 | PF01280 | eL19  | AE  | A   | –      | –      | P14119 | Q9YF93 | POCX82 |
| L20A<br>(L18A,<br>LX)              | RPL20A<br>RPL18ae<br>RplX | COG2157 | PF01775 | eL20  | E   | A   | –      | –      | P14125 | P58289 | POCX23 |
| L21E                               | RPL21A                    | COG2139 | PF01157 | eL21  | AE  | A   | –      | –      | P12734 | P58077 | Q02753 |
| L24E                               | RPL24A                    | COG2075 | PF01246 | eL24  | AE  | A   | –      | –      | P14116 | Q9Y9A7 | P04449 |
| L30E                               | RPL30E                    | COG1911 | PF01248 | eL30  | AE  | A   | –      | –      | –      | Q9YAX7 | P14120 |
| L31E                               | RPL31A                    | COG2097 | PF01198 | eL31  | AE  | A   | –      | –      | P18138 | Q9YD25 | POC2H8 |
| L32E                               | Rpl32e                    | COG1717 | PF01655 | eL32  | AE  | A   | –      | –      | P12736 | Q9YF92 | P38061 |
| L34E                               | RPL34A                    | COG2174 | PF01199 | eL34  | AE  | A   | –      | –      | –      | P58026 | P87262 |
| L35AE/<br>L33A                     | Rpl35A                    | COG2451 | PF01247 | eL33  | AE  | A   | –      | –      | –      | Q9Y9G4 | P05744 |
| L37E                               | RPL37A                    | COG2126 | PF01907 | eL37  | AE  | A   | –      | –      | P32410 | Q9YEQ4 | P49166 |
| L39E                               | RPL39                     | COG2167 | PF00832 | eL39  | AE  | A   | –      | –      | P22452 | P59472 | P04650 |
| L40E                               | RPL40A                    | COG1552 | PF01020 | eL40  | AE  | A   | –      | –      | Q5UYU5 | Q9YFY7 | POCH08 |
| L44E                               | RPL42A                    | COG1631 | PF00935 | eL42  | AE  | A   | –      | –      | P32411 | Q9YF00 | POCX27 |
| L37AE/<br>L43A                     | RPL43A                    | COG1997 | PF01780 | eL43  | AE  | A   | –      | –      | P60619 | Q9YC06 | POCX25 |
| S3AE                               | RPS3A                     | COG1890 | PF01015 | eS1   | AE  | A   | –      | –      | Q5V296 | Q9YCV8 | P33442 |

|                |         |         |                     |      |    |   |   |   |                |        |        |
|----------------|---------|---------|---------------------|------|----|---|---|---|----------------|--------|--------|
| S4E            | RPS4A   | COG1471 | PF00900+<br>PF16121 | eS4  | AE | A | – | – | P22510         | Q9YF85 | POCX35 |
| S6E<br>(S10)   | RPS6A   | COG2125 | PF01092             | eS6  | AE | A | – | – | P21509         | Q9Y9B6 | POCX37 |
| S8E            | RPS8A   | COG2007 | PF01201             | eS8  | AE | A | – | – | P49402         | Q9YDY0 | POCX39 |
| S17E           | RPS17A  | COG1383 | PF00833             | eS17 | AE | A | – | – | Q5V5R5         | Q9YA67 | P02407 |
| S19E<br>(S16A) | RPS19A  | COG2238 | PF01090             | eS19 | AE | A | – | – | P19952         | Q9YD22 | P07280 |
| S24E           | RPS24A  | COG2004 | PF01282             | eS24 | AE | A | – | – | P19953         | Q9YCY0 | POCX31 |
| S25e           | RPS25   | COG4901 | PF03297             | eS25 | AE | A | – | – | –              | Q9Y914 | Q3E792 |
| S26e           | RPS26B  | COG4830 | PF01283             | eS26 | E  | A | – | – | –              | Q05DX2 | P39938 |
| S27AE          | RPS27ae | COG1998 | PF01599             | eS31 | AE | A | – | – | Q06125         | P61297 | P05759 |
| S27E           | RPS27A  | COG2051 | PF01667             | eS27 | AE | A | – | – | Q5UX21         | Q9YF01 | P35997 |
| S28E/<br>S33   | RPS28A  | COG2053 | PF01200             | eS28 | AE | A | – | – | A0A4P8<br>K2X9 | Q9Y9A6 | Q3E7X9 |
| S30            | RPS30   | COG4919 | PF04758             | eS30 | AE | A | – | – | –              | Q9Y9T9 | POCX33 |

<sup>a</sup> – A more detailed version of this table with UniProt names and the RP lists of the archaeon *Sulfolobus acidocaldarius*, chloroplast-encoded RPs in *Euglena gracilis*, and the chloroplast- and mitochondria-encoded RPs of the green alga *Chara vulgaris* is available in Excel format as Supplementary Table S6.

<sup>b</sup> – These COG and Pfam numbers can be used to view the respective database entries, e.g., for L1 protein, as <https://www.ncbi.nlm.nih.gov/research/cog/cog/COG0081/> and <http://pfam.xfam.org/family/PF00687>.

<sup>c</sup> – Ribosomal protein names in the universal nomenclature of Ban *et al.*, 2014 (2).

<sup>d</sup> – Presence of the respective proteins in bacteria (B), archaea (A) and eukaryotes (E) according to Ban *et al.* (2014) and in COGs. Discrepancies between the two are highlighted in yellow.

<sup>e</sup> – These accession numbers can be used to view the respective protein entries in the NCBI protein database and in UniProt, e.g. for L1 protein, as <https://www.ncbi.nlm.nih.gov/protein/P0A7L0> and <https://www.uniprot.org/uniprot/P0A7L0> (*E. coli*), <https://www.ncbi.nlm.nih.gov/protein/Q06797> and <https://www.uniprot.org/uniprot/Q06797> (*B. subtilis*), and so on.

Green shading indicates *E.coli* proteins with viable full-length deletion mutants in the Keio collection (6) and those *B. subtilis* proteins that are marked non-essential in SubtiWiki (7).

**Table S2. Frameshifts and point mutations in ribosomal protein genes in the genomes covered by the COG database**

| Organism name, genome GenBank accession no.                           | Genome size, Mb | Taxonomy in COGs | Protein | COG     | Frame 1 boundaries, protein ID (if available)                   | Frame 2 boundaries, protein ID (if available) |
|-----------------------------------------------------------------------|-----------------|------------------|---------|---------|-----------------------------------------------------------------|-----------------------------------------------|
| <i>Actinobaculum</i> sp. 313, CP029033.1                              | 2.77            | Actino-bacteria  | L2      | COG0090 | Frame +1: 857650..858100                                        | Frame +3: 858099..858464                      |
|                                                                       |                 |                  | L14     | COG0093 | Frame +2: 861053..861328                                        | Frame +1: 861334..861417                      |
| <i>Advenella kashmirensis</i> WT001, AFK64574.1                       | 4.42            | Beta             | L1      | COG0081 | Frame -2: 4318292..4318771                                      | Frame -1: 4318095..4318293                    |
|                                                                       |                 |                  | L6      | COG0097 | Frame -2: 4158914..4159123                                      | Frame -1: 4158609..4158920                    |
|                                                                       |                 |                  | L21     | COG0261 | Frame -2: 1061612..1061875                                      | Frame -1: 1061574..1061615                    |
|                                                                       |                 |                  | S6      | COG0360 | Frame -1: 2704266..2704538                                      | Frame -3: 2704189..2704242                    |
| <i>Anaerotignum propionicum</i> DSM 1682, CP014223.1                  | 3.12            | Clostridia       | S4      | COG0522 | Frame +2: 585926..586072                                        | Frame +1: 586075..586461                      |
| <i>Atlantibacter hermannii</i> NCTC12129, LR134136.1                  | 4.55            | Gamma            | L23     | COG0089 | Frame +1: 428506..428781; VDZ71398.1                            | Frame +3: 428748..428789                      |
|                                                                       |                 |                  | S9      | COG0103 | Frame +1: 504925..504996                                        | Frame +2: 504992..505315                      |
| <i>Azorhizobium caulinodans</i> ORS 571, AP009384.1                   | 5.37            | Alpha            | L9      | COG0359 | Frame -3: 4895567..4895716; BAF90303.1                          | Frame -2: 4895154..4895636; BAF90302.1        |
| <i>Breoghania</i> sp. L-A4, CP031841.1                                | 5.03            | Alpha            | S5      | COG0098 | Frame +1: 3228187..3228483                                      | Frame -3: 3227942..3228184                    |
| <i>Brucella melitensis</i> str. 16M AE008917.1, AE008917.1            | 3.29            | Alpha            | L27     | COG0211 | Frame -2: 209218..209487, wrong translation start in AAL51384.1 |                                               |
| " <i>Ca. Atelocyanobacterium thalassa</i> " isolate ALOHA, CP001842.1 | 1.44            | Cyano-bacteria   | S17     | COG0186 | Frame +3: 1181154..1181309                                      | Frame +1: 1181314..1181391                    |
| " <i>Ca. Methanomethylophilus alvus</i> " Mx-05, CP017686.1           | 1.67            | Eury-archaeota   | S14     | COG0199 | Frame -3: 1401381 to 1401527, no N-terminal fragment            |                                               |
| " <i>Ca. Nanopusillus acidilobi</i> ", CP010514.1                     | 0.61            | Other archaea    | S14     | COG0199 | Frame -3: 604224..604298                                        | Frame -1: 604160..604207                      |
| " <i>Ca. Tenderia electrophaga</i> " CP013099                         | 3.76            | Gamma            | S19     | COG0185 | Frame +3: 877839..879123, 94 aa, no start codon                 |                                               |
| " <i>Ca. Uzinura diaspidicola</i> " ASNER, CP003263.1                 | 0.26            | Bacteroidetes    | L21     | COG0261 | Frame +1: 100210..100434                                        | Frame +3: 100422..100508                      |

|                                                            |      |                     |        |         |                                                                                              |                                           |
|------------------------------------------------------------|------|---------------------|--------|---------|----------------------------------------------------------------------------------------------|-------------------------------------------|
| <i>Desulfotalea psychrophila</i><br>LSv54, CR522870.1      | 3.66 | Delta               | L6     | COG0097 | Frame +2; 1279586..1279756,<br>CAG35868.1                                                    | Frame +2: 1279755..1280131,<br>CAG35869.1 |
|                                                            |      |                     | S8     | COG0096 | Frame +3: 1279164..1279361                                                                   | Frame +2: 1279352..1279561                |
| <i>Enterococcus faecalis</i> V583,<br>AE016830.1           | 3.36 | Bacilli             | L13    | COG0102 | Frame -3: 3100862..3100966                                                                   | Frame -1: 3100543..3100860                |
| <i>Faecalibacterium prausnitzii</i><br>A2165, CP022479.1   | 3.11 | Clostridia          | L22    | COG0091 | Frame +1: 2112610..2112750                                                                   | Frame +3: 2112726..2112941                |
| <i>Fronohabitan</i> sp. PAMC<br>28766, CP014513.1          | 4.77 | Actino-<br>bacteria | L7/L12 | COG0222 | Frame -3: 3920472..3920576                                                                   | Frame -2: 3920254..3920415                |
|                                                            |      |                     | S8     | COG0096 | Frame +3: 1279164..1279361                                                                   | Frame +2: 1279352..1279561                |
| <i>Gottschalkia acidurici</i> 9a,<br>CP003326.1            | 3.11 | Tissierellia        | L9     | COG0359 | Frame -2: 3004298..3004453,                                                                  | Frame -1: 3004155..3004271                |
| <i>Ketogulonicigenium vulgare</i><br>Y25, CP002224.1       | 3.29 | Alpha               | S18    | COG0238 | Frame -3: 1093683..1093817                                                                   | Frame -1: 1093583..1093654                |
| <i>Lactobacillus acidophilus</i><br>NCFM, CP000033.3       | 1.99 | Bacilli             | S19    | COG0185 | Frame +3: 293403..293528                                                                     | Frame +1: 293482..293685                  |
| <i>Laribacter hongkongensis</i><br>HLHK9, CP001154.1       | 3.17 | Beta                | S9     | COG0103 | Frame -2: 2660379..2660627                                                                   | Frame -3: 2660237..2660416                |
| <i>Massilia putida</i> 6NM-7T,<br>CP019038.1               | 7.52 | Beta                | L11    | COG0080 | Frame +3: 4335990..4336055                                                                   | Frame +2: 4336052..4336417                |
| <i>Melioribacter roseus</i> P3M-2,<br>CP003557.1           | 3.3  | Other<br>bacteria   | S4     | COG0522 | Frame -1: 232066..232254                                                                     | Frame -3: 231632..232075                  |
| <i>Methylomusa anaerophila</i><br>MMFC1, AP018449.1        | 4.78 | Negati-<br>vicutes  | L35    | COG0291 | Frame +1: 3868123..3868230,<br>BBB92833.1                                                    | Frame +2: 386226.. 3868318                |
| Onion yellows phytoplasma<br>OY-M, AP006628.2              | 0.85 | Mollicutes          | L3     | COG0087 | Frame +1: 243267..243902, BAD04285.1<br>Lost start codon results in 65 N-terminal aa missing |                                           |
|                                                            |      |                     | L24    | COG0198 | Frame +3: 248499..248693                                                                     | Frame +1: 248680..248838                  |
|                                                            |      |                     | S4     | COG0522 | Frame -3: 658421..658540;<br>BAD04671.1                                                      | Frame +2: 657948..658430                  |
| <i>Paenalcaligenes hominis</i><br>15S00501, CP019697.1     | 2.69 | Beta                | L2     | COG0090 | Frame -1: 1598924..1599670                                                                   | Frame -3: 1598847..1598924                |
|                                                            |      |                     | L3     | COG0087 | Frame -3: 1601258..1600791                                                                   | Frame -2: 1600585.. 1600788               |
| <i>Parabacteroides distasonis</i><br>ATCC 8503, CP000140.1 | 4.81 | Bactero-<br>idetes  | S4     | COG0522 | Frame -3: 2777237..2777734                                                                   | Frame -2: 2777133..2777264                |
| <i>Parachlamydia acanthamo-<br/>ebae</i> UV-7, FR872580.1  | 3.07 | Chlamy-<br>diae     | S15    | COG0184 | Frame -1: 1022709..1022873                                                                   | Frame -2: 1022606..1022704                |



|                                                               |      |               |        |         |                                                          |                                                          |
|---------------------------------------------------------------|------|---------------|--------|---------|----------------------------------------------------------|----------------------------------------------------------|
| <i>Paraglaciecola psychrophila</i> 170, CP003837.1            | 5.41 | Gamma         | L2     | COG0090 | Frame -3: 4969102..4969206                               | Frame -2: 4968386..4969063, AGH47270.1                   |
|                                                               |      |               | L31    | COG0254 | Frame +2: 218429..218527                                 | Frame +1: 218527..218619, AGH42341.1                     |
| <i>Plesiomonas shigelloides</i> MS-17-188, CP027852.1         | 3.97 | Gamma         | S8     | COG0096 | Frame -2: 2081499..208159                                | Frame -1: 2081212..2081493                               |
| <i>Providencia stuartii</i> MRSN 2154                         | 4.4  | Gamma         | L7/L12 | COG0222 | Frame -2: 1846220.. 1846558, AFH93584.1                  | Frame -3: 1846193.. 1846227                              |
| <i>Rodentibacter pneumotropicus</i> NCTC8284, LR134405.1      | 2.44 | Gamma         | L7/L12 | COG0222 | Frame +3: 225381..225467                                 | Frame +2: 225530..225745                                 |
|                                                               |      |               | S16    | COG0228 | Frame -3: 2228925..2228972                               | Frame -2: 2228728..2228937                               |
|                                                               |      |               | S20    | COG0268 | Frame +3: 2158104..2158226                               | Frame +1: 2158279..2158371                               |
|                                                               |      |               | L27    | COG0211 | Frame +1: 575761..576006, no start codon, point mutation |                                                          |
| <i>Salinicola tamaricis</i> F01, CP023559.1                   | 4.28 | Gamma         | L6P    | COG0097 | Frame -2: 1172703..1172332                               | Frame -1: 1172314..1172180                               |
|                                                               |      |               | L7/L12 | COG0222 | Frame -3: 1193430..1193516                               | Frame -2: 1193182..1193373<br>Frame -1: 1193153..1193194 |
|                                                               |      |               | L9     | COG0359 | Frame -1: 742979..743326                                 | Frame -3: 742917..742979                                 |
|                                                               |      |               | L25    | COG1825 | Frame -1: 3431492..3431671                               | Frame -3: 3431097..3431501                               |
|                                                               |      |               | S4     | COG0522 | Frame -3: 1167843..1168277                               | Frame -2: 1167665..1167730                               |
| <i>Simkania negevensis</i> Z, FR872582.1                      | 2.63 | Chlamydiae    | L31    | COG0254 | Frame +1: 787441..787494                                 | Frame +2: 787496..787678, CCB88630.1                     |
| <i>Sulfodiococcus acidiphilus</i> HS-1, AP018553.1            | 2.35 | Crenarchaeota | L2     | COG0090 | Frame +1: 267295..267639, BBD71897.1                     | Frame: +3: 267636..268019, BBD71898.1                    |
| <i>Sulfuricella denitrificans</i> skB26, AP013066.1           | 3.22 | Beta          | L9     | COG0359 | Frame -2: 1812117..1812246, BAN35601.1                   | Frame -1: 1811804..1812166, BAN35600.1                   |
| <i>Syntrophus aciditrophicus</i> SB CP000252.1,               | 3.18 | Delta         | S12    | COG0048 | Frame +2: 311162..311347                                 | Frame +3: 311373..311525                                 |
| <i>Thioalkalivibrio nitratireducens</i> DSM 14787, CP003989.2 | 4.00 | Gamma         | L36    | COG0257 | Frame -2: 2648149..2648093                               | Frame -3: 2648085..2648038                               |
| <i>Thioclava nitratireducens</i> 25B10_4, CP019437.1          | 4.24 | Alpha         | S16    | COG0228 | Frame -3: 611211..611582, 123 aa, no start codon         |                                                          |
| <i>Xanthobacter autotrophicus</i> Py2, CP000781.1             | 5.63 | Alpha         | L14    | COG0093 | Frame +1: 1902232..1902666, ABS66934.1                   | Frame +2: 5308729..5308830 (not adjacent)                |

**Table S3. Examples of unannotated ORFs coding for ribosomal proteins in the genomes covered by the COG database**

| Organism name, GenBank accession no.                         | Genome size, Mb | Taxonomy in COGs     | Ribosomal protein | COG no. | Newly translated ORF; locus tag, if available |
|--------------------------------------------------------------|-----------------|----------------------|-------------------|---------|-----------------------------------------------|
| <b>BACTERIA</b>                                              |                 |                      |                   |         |                                               |
| <i>Sulfobacillus acidophilus</i> TPY, CP002901.1             | 3.55            | Clostridia           | L27               | COG0211 | ORF: 607200..607481 Frame: +3; 93 aa          |
|                                                              |                 |                      | L28               | COG0227 | ORF: 1069175..1069366, Frame: -1; 63 aa       |
|                                                              |                 |                      | L32               | COG0333 | ORF: 1133208..1133387, Frame: +3; 58 aa       |
|                                                              |                 |                      | L33               | COG0267 | ORF: 306096..306302, Frame: +3; 68 aa         |
|                                                              |                 |                      | L36               | COG0257 | ORF: 343563..343673, Frame: = +3; 37 aa       |
|                                                              |                 |                      | S14               | COG0199 | ORF: 337812..337997, Frame: +3 ; 61 aa        |
| <i>Pelotomaculum thermopropionicum</i> SI, AP009389.1        | 3.03            | Clostridia           | L28               | COG0227 | ORF: 1841595..1841786, Frame: +3; 63 aa       |
|                                                              |                 |                      | L32               | COG0333 | ORF: 1830440..1830619, Frame: -1; 59 aa       |
|                                                              |                 |                      | L34               | COG0230 | ORF: 3024909..3025082, Frame: -3; 57 aa       |
|                                                              |                 |                      | S14               | COG0199 | ORF: 335426..335614, Frame: +2; 62 aa         |
|                                                              |                 |                      | S21               | COG0828 | ORF: 901026..901331, Frame: +3; 101 aa        |
| <i>Herpetosiphon aurantiacus</i> DSM 785, CP000875.1         | 6.79            | Chloroflexi          | L28               | COG0227 | ORF: 438793..438975, Frame: +1; 60 aa         |
|                                                              |                 |                      | L29               | COG0255 | ORF: 6258620.. 6258832, Frame: +2; 70 aa      |
|                                                              |                 |                      | L35               | COG0291 | ORF: 5927538..5927750, Frame: -2; 70 aa       |
|                                                              |                 |                      | L36               | COG0257 | ORF: 6266198..6266311, Frame: +2; 38 aa       |
| "Ca. Methylomirabilis oxyfera", FP565575.1                   | 2.75            | Other bacteria       | L28               | COG0227 | ORF: 1181939..1182139, Frame: +2; 67 aa       |
|                                                              |                 |                      | L33               | COG0267 | ORF:459805..459951, Frame: +1; 49 aa          |
|                                                              |                 |                      | L34               | COG0230 | ORF: 2546125..2546259, Frame: +1; 44 aa       |
|                                                              |                 |                      | L36               | COG0257 | ORF: 488708..488818, Frame: +2; 37 aa         |
|                                                              |                 |                      | S13               | COG0099 | ORF: 488935..489300, Frame: +1, 124 aa        |
| "Candidate division WWE3 bacterium RAAC2 WWE3 1", CP006914.1 | 0.88            | Other bacteria       | L34               | COG0230 | ORF: 795925..796083, Frame: -1; 52 aa         |
|                                                              |                 |                      | L36               | COG0257 | ORF: 890953..890843, Frame: -2; 38 aa         |
|                                                              |                 |                      | S14               | COG0199 | ORF: 73005..73229, Frame: +3; 74 aa           |
| <i>Planktomarina temperata</i> RCA23, CP003984.1             | 3.29            | Alphaproteo bacteria | L34               | COG0230 | ORF: 2522654..2522788, Frame: +2; 44 aa       |
|                                                              |                 |                      | L36               | COG0257 | ORF: 3024835..3024960, Frame: = +1; 41 aa     |
| "Ca. Paracaedimonas acanthamoebae", CP008936.1               | 2.18            | Alphaproteo bacteria | L9                | COG0359 | ORF: 611520 to 611951, Frame: +3; 144 aa      |
|                                                              |                 |                      | L32               | COG0333 | ORF: 164521..164676, Frame: -3; 59 aa         |
|                                                              |                 |                      | L36               | COG0257 | ORF: 1218708..1218833, Frame: +3; 41 aa       |

|                                                                   |      |                       |           |         |                                                                                 |
|-------------------------------------------------------------------|------|-----------------------|-----------|---------|---------------------------------------------------------------------------------|
| <i>Rugosibacter aromatici-vorans</i> Ca6, CP010554.1              | 2.93 | Betaproteobacteria    | L36       | COG0257 | ORF: 2557159..2557269, Frame: -3; 37 aa                                         |
|                                                                   |      |                       | S14       | COG0199 | ORF: 2561406..2561747, Frame: -1; 113 aa                                        |
| "Candidatus Wolfebacteria bacterium GW2011 GWB1 47 1", CP011209.1 | 0.98 | Other bacteria        | L32       | COG0333 | ORF: 333695..333901, Frame: -3; 68 aa                                           |
|                                                                   |      |                       | L34       | COG0230 | ORF: 178951..179097, Frame: -1; 48 aa                                           |
| "Ca. Tenderia electrophaga" CP013099.1                            | 3.76 | Gammaproteobacteria   | L36       | COG0257 | ORF: 885686..885796, Frame: +2; 37 aa                                           |
|                                                                   |      |                       | L30/L7E   | COG1841 | ORF: 883593..883778, Frame: +3; 61 aa                                           |
| <i>Hydrogenimonas</i> sp. MAG, AP019005.1                         | 2.19 | Epsilonproteobacteria | L36       | COG0257 | ORF: 2048969..2048859, Frame: -2; 37 aa                                         |
|                                                                   |      |                       | S14       | COG0199 | ORF: 2053957..2054142, Frame: -1; 61 aa                                         |
| <i>Paucimonas lemoignei</i> NCTC10937, LS483371.1                 | 5.92 | Betaproteobacteria    | L36       | COG0257 | ORF: 5452130..5452246, Frame: -3; 38 aa                                         |
|                                                                   |      |                       | S13       | COG0099 | ORF: 5451643..5451999, Frame: -1; 118 aa                                        |
|                                                                   |      |                       | S12       | COG0048 | ORF: 5466930..5467298, Frame: -2; 123 aa                                        |
| <i>Salinicola tamaricis</i> F01, CP023559.1                       | 4.28 | Gammaproteobacteria   | L4        | COG0088 | ORF 1178149..1178727, Frame: -3; 192 aa                                         |
|                                                                   |      |                       | S18       | COG0238 | ORF: 744224..744472, Frame: -1; 82 aa                                           |
| "Ca. Tremblaya phenacola PAVE", CP003982.1                        | 0.17 | Betaproteobacteria    | L28       | COG0227 | ORF: 59642..59827, Frame: -2; 62 aa (replaces AGO28266.1; locus tag=TPPAVE_073) |
| <b>ARCHAEA</b>                                                    |      |                       |           |         |                                                                                 |
| <i>"Ca. Nanopusillus acidilobi"</i> , CP010514                    | 0.61 | Other archaea         | L6P/L9E   | COG0097 | ORF: 501349..501882, Frame: -2; 177 aa; locus tag: Nps_02895                    |
|                                                                   |      |                       | L15e      | COG1632 | ORF: 250345..250866, Frame: +1; 173 aa; locus tag: Nps_01385                    |
|                                                                   |      |                       | L16/L10AE | COG0197 | ORF 579086..579643, Frame: -1; 185 aa; locus tag: Nps_03305                     |
|                                                                   |      |                       | L22       | COG0091 | ORF: 586054..586629,( Frame: +1; 191 aa; locus_tag: Nps_03365                   |
|                                                                   |      |                       | L24       | COG0198 | ORF: 503210..50374, Frame: -1, 174 aa; locus_tag: Nps_02910                     |
|                                                                   |      |                       | S6e       | COG2125 | ORF: 329344..329733; Frame -2; 129 aa; locus tag: Nps_01880                     |
|                                                                   |      |                       | S15P/S13E | COG0184 | ORF: 269039..269431, Frame: -1; 130 aa; locus tag: Nps_01520                    |
|                                                                   |      |                       | L35ae     | COG2451 | ORF: 558084..558428, Frame -3; 114 aa; locus tag: Nps_03205                     |
|                                                                   |      |                       | L37e      | COG2126 | ORF: 580869..581003, Frame -3; 54 aa                                            |

|                                                    |      |                 |      |         |                                                                |
|----------------------------------------------------|------|-----------------|------|---------|----------------------------------------------------------------|
| <i>Ca. Nitrosocosmicus oleophilus</i> , CP012850.1 | 3.43 | Thaum-archaeota | L24e | COG2075 | ORF: 865559..865771, Frame +2, 70 aa                           |
| <i>Nanoarchaeum equitans</i> Kin4-M, AE017199.1    | 0.49 | Other archaea   | L24e | COG2075 | ORF: 297703..297867, Frame +1; 54 aa                           |
|                                                    |      |                 | L37e | COG2126 | ORF: 5537..5707, Frame: -1; 56 aa                              |
| "Nanohaloarchaea archaeon SG9", CP012986.1         | 1.12 | Eury-archaeota  | L18  | COG0256 | ORF: 47533..48027, Frame: -1; 169 aa; locus tag: AQV86_00305   |
|                                                    |      |                 | S2   | COG0052 | ORF: 413675..414298, Frame: -3; 207 aa; locus tag: AQV86_02305 |
|                                                    |      |                 | S28e | COG2053 | ORF: 411826..411990, Frame: -1; 58 aa                          |
|                                                    |      |                 | L24e | COG2075 | ORF: 411666..411818, Frame +2, 50 aa                           |
|                                                    |      |                 | L40e | COG1552 | ORF: 708355..708516, Frame +1, 53 aa                           |
| <i>Thermofilum adornatus</i> , CP006646.1          | 1.75 | Cren-archaeota  | L34e | COG2174 | ORF: 785414..785677, Frame -2, 87 aa                           |

**Table S4. Experimental data on large-scale inactivation of ribosomal protein-coding genes**

| <b>Organism</b>                     | <b>Inactivated or deleted genes<sup>a</sup></b>                                              | <b>Reference</b> |
|-------------------------------------|----------------------------------------------------------------------------------------------|------------------|
| <i>Acinetobacter baumannii</i>      | <b>L9, L19, L22, L27, L31, L32, L33, S1, S20</b>                                             | (8)              |
| <i>Acinetobacter baylyi</i>         | <b>L9, L27, L31, L33, L36</b>                                                                | (9)              |
| <i>Agrobacterium fabrum</i>         | <b>L9, L11, L15, L31, L32, L33, S7, S12, S17, S19, S21</b>                                   | (10)             |
| <i>Bacillus subtilis</i>            | <b>L11, L25, S1</b>                                                                          | (11)             |
|                                     | <b>L1, L9, L11, L15, L22, L23, L25, L28, L29, L31, L32, L33, L34, L35, L36, S6, S20, S21</b> | (12, 13)         |
|                                     | <b>L1, L23, L34, L36, S6</b>                                                                 | (14)             |
| <i>Bacteroides fragilis</i>         | <b>L9, L17, L19, L32, L34</b>                                                                | (15)             |
| <i>Bacteroides thetaiotaomicron</i> | <b>L9, L19</b>                                                                               | (16)             |
| <i>Brevundimonas subvibrioides</i>  | <b>L9, L30, L31, L35, S15, S16</b>                                                           | (10)             |
| <i>Burkholderia cenocepacia</i>     | <b>L9, L18, L19, L21, L25, L30, L36, S2, S13, S15, S17, S18, S21</b>                         | (17, 18)         |
| <i>Burkholderia thailandensis</i>   | <b>L1, L9, L21, L31, S2, S3, S15</b>                                                         | (19)             |
| <i>Campylobacter jejuni</i>         | <b>L9, L20, L25, L33, L35, S14</b>                                                           | (20)             |
|                                     | <b>L3, L9, L21, L33, S1, S2, S4, S5, S7, S17</b>                                             | (21)             |
|                                     | <b>L9, L19, L20, L27, L31, S1, S4, S8, S15, S18</b>                                          | (22)             |
| <i>Caulobacter crescentus</i>       | <b>L1, L10, L28, L29, L30, L31, L33, L35</b>                                                 | (23)             |
| <i>Escherichia coli</i>             | <b>L5, L9, L16, L22, S1, S3, S7</b>                                                          | (24)             |
|                                     | <b>L1, L9, L11, L25, L31, L32, L33, L35, L36, S6, S15, S20, S21</b>                          | (6)              |
|                                     | <b>S6, S9, S13, S15, S17, S20</b>                                                            | (25)             |
|                                     | <b>L15, L21, L24, L27, L29, L30, L34, S9, S17</b>                                            | (26)             |
|                                     | <b>L1, L9, L31, L32, L33, S6, S9, S15, S18, S20 (L13, S1, S2, S4, S7, S12, S17, S18)</b>     | (27)             |
|                                     | <b>L31, L36, S1, S15, S18</b>                                                                | (28)             |
|                                     | <b>L1, L9, L11, L25, L31, L32, L33, L35, L36, S6, S15, S20, S21</b>                          | (29)             |
| <i>Francisella novicida</i>         | <b>L9, L19, L33, S1, S21</b>                                                                 | (30)             |
| <i>Francisella tularensis</i>       | <b>L1, S1</b>                                                                                | (31)             |
| <i>Haemophilus influenzae</i>       | <b>L7, L9</b>                                                                                | (32)             |
| <i>Helicobacter pylori</i>          | <b>L10, L18, L19, L33, S11, S13, S16</b>                                                     | (33)             |
| <i>Mycobacterium avium</i>          | <b>L7/L12, L9, L10, L19, L25, L28, L31, L32, L33, S6, S11, S14, S15, S17, S18</b>            | (34).            |
| <i>Mycobacterium tuberculosis</i>   | <b>L1, L15, L28, L33, L36, S14, S16, S18</b>                                                 | (35)             |
|                                     | <b>L9, L15, L25, L28, L30, L33, S14, S16, S18</b>                                            | (36)             |
|                                     | <b>L1, L5, L9, L22, L25, S1, S2</b>                                                          | (37)             |
| <i>Mycoplasma bovis</i>             | <b>L34</b>                                                                                   | (38)             |
| <i>Mycoplasma pulmonis</i>          | <b>L28, L33, S18</b>                                                                         | (39, 40)         |

|                                   |                                                                                                                        |                      |
|-----------------------------------|------------------------------------------------------------------------------------------------------------------------|----------------------|
| <i>Neisseria gonorrhoeae</i>      | L24, L27, L30, <b>L31, L32, L33</b> , L36, S10, <b>S21</b>                                                             | (41)                 |
| <i>Porphyromonas gingivalis</i>   | <b>L9</b> , L17, <b>L19, L31, L32</b> , L34, <b>S1</b> , S16, S18, <b>S21</b>                                          | (42)                 |
| <i>Providencia stuartii</i>       | <b>L19, L31, S1</b>                                                                                                    | (43)                 |
| <i>Pseudomonas aeruginosa</i>     | L3, L4, <b>L9, L19, L25, L32</b> , S3, S4, S5, S12                                                                     | (44) as cited in (9) |
|                                   | L2, L3, L4, <b>L9, L19</b> , L21, L23, <b>L25</b> , S4, S5, <b>S6</b> , S8, S9, S12, <b>S21</b>                        | (45).                |
|                                   | <b>L9</b> , L13, L17, L21, <b>L25</b> , L27, <b>L28, L31, L33</b> , L34, <b>S1, S6</b> , S9, S10, S15, S18, <b>S20</b> | (46)                 |
|                                   | <b>L9, L25, L31, L32, L33</b> , S15                                                                                    | (47)                 |
|                                   | <b>L9, L25, L31, L32, L33</b> , S2, <b>S21</b>                                                                         | (48)                 |
| <i>Pseudomonas protegens</i>      | <b>L9, L25, L31, L33</b> , L36                                                                                         | (49)                 |
| <i>Rhodopseudomonas palustris</i> | <b>L9</b> , L21, <b>L31, L33, S1</b> , S2, S16                                                                         | (50)                 |
| <i>Rubrivivax gelatinosus</i>     | <b>L9, L25, L33</b>                                                                                                    | (51)                 |
| <i>Salmonella enterica</i>        | L16                                                                                                                    | (52)                 |
|                                   | <b>L1, L9, L31, L32, L33</b> , L36, <b>S20</b>                                                                         | (53)                 |
|                                   | <b>L1, L9, L10, L25, L31, L32, L33</b> , L36, <b>S1</b> , S9, S15, <b>S20, S21</b>                                     | (54)                 |
| <i>Shewanella oneidensis</i> MR-1 | <b>L19</b>                                                                                                             | (55)                 |
| <i>Staphylococcus aureus</i>      | L6, S17                                                                                                                | (56)                 |
|                                   | <b>L19, L25</b> , L27, <b>L28, L33, S1</b> , S14                                                                       | (57)                 |
|                                   | <b>L9, L33, S20</b>                                                                                                    | (58)                 |
|                                   | <b>L1, L9</b> , L11, L21, L23, <b>L25, L28, L32, L33</b> , L34, <b>S1, S20</b>                                         | (59)                 |
| <i>Streptococcus agalactiae</i>   | <b>L9, L28, S2, S6</b> , S14, <b>S20</b>                                                                               | (60)                 |
| <i>Streptococcus mutans</i>       | <b>L9, L19, L28, L32, L33, L35, S1, S20, S21</b>                                                                       | (61)                 |
| <i>Streptococcus pyogenes</i>     | L7/L12, <b>L9</b> , L10, L15, L23, <b>L28, L29, L32</b> , S14, S16, <b>S20</b>                                         | (62)                 |
| <i>Streptococcus sanguinis</i>    | <b>L9</b> , L15, L21, L24, <b>L28, L29</b> , L30, <b>L31, L32, L33, L35</b> , L36, S9, S13, S15, <b>S20, S21</b>       | (63)                 |
| <i>Streptococcus suis</i>         | <b>L9</b> , L10, <b>L28, L32, L33, L35, S1</b> , S2, S12, <b>S20</b>                                                   | (64)                 |
| <i>Synechococcus elongatus</i>    | <b>L9</b> , L15, <b>L28</b>                                                                                            | (65)                 |
| <i>Vibrio cholerae</i>            | <b>L25, L31, L33</b>                                                                                                   | (66)                 |
|                                   | <b>L9, L31, L32</b>                                                                                                    | (67)                 |
| Candidate phyla radiation         | <b>L1, L9</b> , L30                                                                                                    | (68)                 |

<sup>a</sup> – The proteins whose genes that could be inactivated in several distinct lineages are shown in bold. Those proteins for which the data varied between strains are shown in italics.

**Table S5. Loss of ribosomal proteins that differ in their rRNA interactions and the order of assembly**

| 50S subunit protein | Assembly order <sup>a</sup> | Missing in genomes <sup>b</sup> | 30S subunit protein | Assembly order <sup>a</sup> | Missing in genomes <sup>b</sup> |
|---------------------|-----------------------------|---------------------------------|---------------------|-----------------------------|---------------------------------|
| L20                 | I                           | 0                               | S4                  | I                           | 0                               |
| L21                 | I                           | 4                               | S6                  | I                           | 2                               |
| L22                 | I                           | 0                               | S8                  | I                           | 0                               |
| L24                 | I                           | 7                               | S15                 | I                           | 2                               |
| L1                  | II                          | 5                               | S16                 | I                           | 1                               |
| L3                  | II                          | 0                               | S17                 | I                           | 0                               |
| L4                  | II                          | 0                               | S18                 | I                           | 0                               |
| L13                 | II                          | 1                               | S20                 | I                           | 5                               |
| L15                 | II                          | 0                               | S5                  | II                          | 0                               |
| L17                 | II                          | 1                               | S7                  | II                          | 1                               |
| L23                 | II                          | 6                               | S11                 | II                          | 0                               |
| L5                  | III                         | 0                               | S12                 | II                          | 1                               |
| L18                 | III                         | 1                               | S9                  | III                         | 1                               |
| L29                 | III                         | 19                              | S10                 | III                         | 0                               |
| L34                 | III                         | 21                              | S13                 | III                         | 0                               |
| L2                  | IV                          | 0                               | S14                 | III                         | 0                               |
| L14                 | IV                          | 0                               | S19                 | III                         | 0                               |
| L19                 | IV                          | 4                               | S2                  | IV                          | 1                               |
| L32                 | IV                          | 13                              | S3                  | IV                          | 0                               |
| L6                  | V                           | 0                               | S21                 | IV                          | 196                             |
| L9                  | V                           | 14                              |                     |                             |                                 |
| L11                 | V                           | 1                               |                     |                             |                                 |
| L28                 | V                           | 1                               |                     |                             |                                 |
| L33                 | V                           | 6                               |                     |                             |                                 |
| L7/L12              | VI                          | 1                               |                     |                             |                                 |
| L10                 | VI                          | 5                               |                     |                             |                                 |
| L16                 | VI                          | 0                               |                     |                             |                                 |
| L25                 | VI                          | 109                             |                     |                             |                                 |
| L27                 | VI                          | 2                               |                     |                             |                                 |
| L30                 | VI                          | 77                              |                     |                             |                                 |
| L31                 | VI                          | 5                               |                     |                             |                                 |
| L35                 | VI                          | 6                               |                     |                             |                                 |
| L36                 | VI                          | 2                               |                     |                             |                                 |

<sup>a</sup> – Ribosome assembly order and cell coloring is according to Chen and Williamson, 2013 (69)

<sup>b</sup> – Total number of genomes in COGs that are lacking the genes for respective proteins. L29 is mostly lost in tiny genomes (Table 1), absence of L25, L34, and S21 is mostly due to lineage-specific gene loss (Table 2).

## REFERENCES

1. **Mistry J, Chuguransky S, Williams L, Qureshi M, Salazar GA, Sonnhammer ELL, Tosatto SCE, Paladin L, Raj S, Richardson LJ, Finn RD, Bateman A.** 2021. Pfam: The protein families database in 2021. *Nucleic Acids Res* **49**:D412-D419.
2. **Ban N, Beckmann R, Cate JH, Dinman JD, Dragon F, Ellis SR, Lafontaine DL, Lindahl L, Liljas A, Lipton JM, McAlear MA, Moore PB, Noller HF, Ortega J, Panse VG, Ramakrishnan V, Spahn CM, Steitz TA, Tchorzewski M, Tollervey D, Warren AJ, Williamson JR, Wilson D, Yonath A, Yusupov M.** 2014. A new system for naming ribosomal proteins. *Curr Opin Struct Biol* **24**:165-169.
3. **UniProt Consortium.** 2021. UniProt: the universal protein knowledgebase in 2021. *Nucleic Acids Res* **49**:D480-D489.
4. **Cerretti DP, Dean D, Davis GR, Bedwell DM, Nomura M.** 1983. The *spc* ribosomal protein operon of *Escherichia coli*: sequence and cotranscription of the ribosomal protein genes and a protein export gene. *Nucleic Acids Res* **11**:2599-2616.
5. **Koonin EV, Galperin MY.** 1997. Prokaryotic genomes: the emerging paradigm of genome-based microbiology. *Curr Opin Genet Dev* **7**:757-763.
6. **Baba T, Ara T, Hasegawa M, Takai Y, Okumura Y, Baba M, Datsenko KA, Tomita M, Wanner BL, Mori H.** 2006. Construction of *Escherichia coli* K-12 in-frame, single-gene knockout mutants: the Keio collection. *Mol Syst Biol* **2**:2006.0008.
7. **Zhu B, Stülke J.** 2018. SubtiWiki in 2018: from genes and proteins to functional network annotation of the model organism *Bacillus subtilis*. *Nucleic Acids Res* **46**:D743-D748.
8. **Wang N, Ozer EA, Mandel MJ, Hauser AR.** 2014. Genome-wide identification of *Acinetobacter baumannii* genes necessary for persistence in the lung. *mBio* **5**:e01163-14.
9. **de Berardinis V, Vallenet D, Castelli V, Besnard M, Pinet A, Cruaud C, Samair S, Lechaplais C, Gyapay G, Richez C, Durot M, Kreimeyer A, Le Fevre F, Schachter V, Pezo V, Doring V, Scarpelli C, Medigue C, Cohen GN, Marliere P, Salanoubat M, Weissenbach J.** 2008. A complete collection of single-gene deletion mutants of *Acinetobacter baylyi* ADP1. *Mol Syst Biol* **4**:174.
10. **Curtis PD, Brun YV.** 2014. Identification of essential alphaproteobacterial genes reveals operational variability in conserved developmental and cell cycle systems. *Mol Microbiol* **93**:713-735.
11. **Kobayashi K, Ehrlich SD, Albertini A, Amati G, Andersen KK, Arnaud M, Asai K, Ashikaga S, Aymerich S, Bessieres P, Boland F, Brignell SC, Bron S, Bunai K, Chapuis J, Christiansen LC, Danchin A, Debarbouille M, Dervyn E, Deuerling E, Devine K, Devine SK, Dreesen O, Errington J, Fillinger S, Foster SJ, Fujita Y, Galizzi A, Gardan R, Eschevins C, Fukushima T, Haga K, Harwood CR, Hecker M, Hosoya D, Hullo MF, Kakeshita H, Karamata D, Kasahara Y, Kawamura F, Koga K, Koski P, Kuwana R, Imamura D, Ishimaru M, Ishikawa S, Ishio I, Le Coq D, Masson A, Mauel C, et al.** 2003. Essential *Bacillus subtilis* genes. *Proc Natl Acad Sci USA* **100**:4678-4683.
12. **Akanuma G, Nanamiya H, Natori Y, Yano K, Suzuki S, Omata S, Ishizuka M, Sekine Y, Kawamura F.** 2012. Inactivation of ribosomal protein genes in *Bacillus subtilis* reveals importance of each ribosomal protein for cell proliferation and cell differentiation. *J Bacteriol* **194**:6282-6291.
13. **Commichau FM, Pietack N, Stülke J.** 2013. Essential genes in *Bacillus subtilis*: a re-evaluation after ten years. *Mol Biosyst* **9**:1068-1075.



14. **Akanuma G, Yamazaki K, Yagishi Y, Iizuka Y, Ishizuka M, Kawamura F, Kato-Yamada Y.** 2018. Magnesium suppresses defects in the formation of 70S ribosomes as well as in sporulation caused by lack of several individual ribosomal proteins. *J Bacteriol* **200**:e00212-18.
15. **Veeranagouda Y, Husain F, Tenorio EL, Wexler HM.** 2014. Identification of genes required for the survival of *B. fragilis* using massive parallel sequencing of a saturated transposon mutant library. *BMC Genomics* **15**:429.
16. **Goodman AL, McNulty NP, Zhao Y, Leip D, Mitra RD, Lozupone CA, Knight R, Gordon JI.** 2009. Identifying genetic determinants needed to establish a human gut symbiont in its habitat. *Cell Host Microbe* **6**:279-289.
17. **Wong YC, Abd El Ghany M, Naeem R, Lee KW, Tan YC, Pain A, Nathan S.** 2016. Candidate essential genes in *Burkholderia cenocepacia* J2315 identified by genome-wide TraDIS. *Front Microbiol* **7**:1288.
18. **Gislason AS, Turner K, Domaratzki M, Cardona ST.** 2017. Comparative analysis of the *Burkholderia cenocepacia* K56-2 essential genome reveals cell envelope functions that are uniquely required for survival in species of the genus *Burkholderia*. *Microb Genom* **3**:e000140.
19. **Metris A, Reuter M, Gaskin DJ, Baranyi J, van Vliet AH.** 2011. In vivo and in silico determination of essential genes of *Campylobacter jejuni*. *BMC Genomics* **12**:535.
20. **Baugh L, Gallagher LA, Patrapuvich R, Clifton MC, Gardberg AS, Edwards TE, Armour B, Begley DW, Dieterich SH, Dranow DM, Abendroth J, Fairman JW, Fox D, 3rd, Staker BL, Phan I, Gillespie A, Choi R, Nakazawa-Hewitt S, Nguyen MT, Napuli A, Barrett L, Buchko GW, Stacy R, Myler PJ, Stewart LJ, Manoil C, Van Voorhis WC.** 2013. Combining functional and structural genomics to sample the essential *Burkholderia* structome. *PLoS One* **8**:e53851.
21. **Gao B, Lara-Tejero M, Lefebvre M, Goodman AL, Galan JE.** 2014. Novel components of the flagellar system in epsilonproteobacteria. *mBio* **5**:e01349-14.
22. **Mandal RK, Jiang T, Kwon YM.** 2017. Essential genome of *Campylobacter jejuni*. *BMC Genomics* **18**:616.
23. **Christen B, Abeliuk E, Collier JM, Kalogeraki VS, Passarelli B, Collier JA, Fero MJ, McAdams HH, Shapiro L.** 2011. The essential genome of a bacterium. *Mol Syst Biol* **7**:528.
24. **Gerdes SY, Scholle MD, Campbell JW, Balazsi G, Ravasz E, Daugherty MD, Somera AL, Kyrpidis NC, Anderson I, Gelfand MS, Bhattacharya A, Kapatral V, D'Souza M, Baev MV, Grechkin Y, Meeh F, Fonstein MY, Overbeek R, Barabasi AL, Oltvai ZN, Osterman AL.** 2003. Experimental determination and system level analysis of essential genes in *Escherichia coli* MG1655. *J Bacteriol* **185**:5673-5684.
25. **Bubunenko M, Baker T, Court DL.** 2007. Essentiality of ribosomal and transcription antitermination proteins analyzed by systematic gene replacement in *Escherichia coli*. *J Bacteriol* **189**:2844-2853.
26. **Shoji S, Dambacher CM, Shajani Z, Williamson JR, Schultz PG.** 2011. Systematic chromosomal deletion of bacterial ribosomal protein genes. *J Mol Biol* **413**:751-761.
27. **Phan MD, Peters KM, Sarkar S, Lukowski SW, Allsopp LP, Gomes Moriel D, Achard ME, Totsika M, Marshall VM, Upton M, Beatson SA, Schembri MA.** 2013. The serum resistome of a globally disseminated multidrug resistant uropathogenic *Escherichia coli* clone. *PLoS Genet* **9**:e1003834.
28. **Warr AR, Hubbard TP, Munera D, Blondel CJ, Abel Zur Wiesch P, Abel S, Wang X, Davis BM, Waldor MK.** 2019. Transposon-insertion sequencing screens unveil requirements for EHEC growth and intestinal colonization. *PLoS Pathog* **15**:e1007652.

29. **Tong M, French S, El Zahed SS, Ong WK, Karp PD, Brown ED.** 2020. Gene dispensability in *Escherichia coli* grown in thirty different carbon environments. *mBio* **11**:e02259-20.
30. **Gallagher LA, Ramage E, Jacobs MA, Kaul R, Brittnacher M, Manoil C.** 2007. A comprehensive transposon mutant library of *Francisella novicida*, a bioweapon surrogate. *Proc Natl Acad Sci USA* **104**:1009-1014.
31. **Ireland PM, Bullifent HL, Senior NJ, Southern SJ, Yang ZR, Ireland RE, Nelson M, Atkins HS, Titball RW, Scott AE.** 2019. Global analysis of genes essential for *Francisella tularensis* Schu S4 growth in vitro and for fitness during competitive Infection of Fischer 344 rats. *J Bacteriol* **201**:e00630-18.
32. **Akerley BJ, Rubin EJ, Novick VL, Amaya K, Judson N, Mekalanos JJ.** 2002. A genome-scale analysis for identification of genes required for growth or survival of *Haemophilus influenzae*. *Proc Natl Acad Sci USA* **99**:966-971.
33. **Salama NR, Shepherd B, Falkow S.** 2004. Global transposon mutagenesis and essential gene analysis of *Helicobacter pylori*. *J Bacteriol* **186**:7926-7935.
34. **Matern WM, Jenquin RL, Bader JS, Karakousis PC.** 2020. Identifying the essential genes of *Mycobacterium avium* subsp. *hominissuis* with Tn-Seq using a rank-based filter procedure. *Sci Rep* **10**:1095.
35. **Sasseti CM, Boyd DH, Rubin EJ.** 2003. Genes required for mycobacterial growth defined by high density mutagenesis. *Mol Microbiol* **48**:77-84.
36. **Griffin JE, Gawronski JD, Dejesus MA, Ioerger TR, Akerley BJ, Sasseti CM.** 2011. High-resolution phenotypic profiling defines genes essential for mycobacterial growth and cholesterol catabolism. *PLoS Pathog* **7**:e1002251.
37. **Zhang YJ, Ioerger TR, Huttenhower C, Long JE, Sasseti CM, Sacchettini JC, Rubin EJ.** 2012. Global assessment of genomic regions required for growth in *Mycobacterium tuberculosis*. *PLoS Pathog* **8**:e1002946.
38. **Sharma S, Markham PF, Browning GF.** 2014. Genes found essential in other mycoplasmas are dispensable in *Mycoplasma bovis*. *PLoS One* **9**:e97100.
39. **Dybvig K, Lao P, Jordan DS, Simmons WL.** 2010. Fewer essential genes in mycoplasmas than previous studies suggest. *FEMS Microbiol Lett* **311**:51-55.
40. **French CT, Lao P, Loraine AE, Matthews BT, Yu H, Dybvig K.** 2008. Large-scale transposon mutagenesis of *Mycoplasma pulmonis*. *Mol Microbiol* **69**:67-76.
41. **Remmele CW, Xian Y, Albrecht M, Faulstich M, Fraunholz M, Heinrichs E, Dittrich MT, Muller T, Reinhardt R, Rudel T.** 2014. Transcriptional landscape and essential genes of *Neisseria gonorrhoeae*. *Nucleic Acids Res* **42**:10579-10595.
42. **Klein BA, Tenorio EL, Lazinski DW, Camilli A, Duncan MJ, Hu LT.** 2012. Identification of essential genes of the periodontal pathogen *Porphyromonas gingivalis*. *BMC Genomics* **13**:578.
43. **Johnson AO, Forsyth V, Smith SN, Learman BS, Brauer AL, White AN, Zhao L, Wu W, Mobley HLT, Armbruster CE.** 2020. Transposon insertion site sequencing of *Providencia stuartii*: Essential genes, fitness factors for catheter-associated urinary tract infection, and the impact of polymicrobial infection on fitness requirements. *mSphere* **5**:e00412-20.
44. **Jacobs MA, Alwood A, Thaipisuttikul I, Spencer D, Haugen E, Ernst S, Will O, Kaul R, Raymond C, Levy R, Chun-Rong L, Guenther D, Bovee D, Olson MV, Manoil C.** 2003. Comprehensive transposon mutant library of *Pseudomonas aeruginosa*. *Proc Natl Acad Sci USA* **100**:14339-14344.

45. **Liberati NT, Urbach JM, Miyata S, Lee DG, Drenkard E, Wu G, Villanueva J, Wei T, Ausubel FM.** 2006. An ordered, nonredundant library of *Pseudomonas aeruginosa* strain PA14 transposon insertion mutants. *Proc Natl Acad Sci USA* **103**:2833-2838.
46. **Skurnik D, Roux D, Aschard H, Cattoir V, Yoder-Himes D, Lory S, Pier GB.** 2013. A comprehensive analysis of in vitro and in vivo genetic fitness of *Pseudomonas aeruginosa* using high-throughput sequencing of transposon libraries. *PLoS Pathog* **9**:e1003582.
47. **Lee SA, Gallagher LA, Thongdee M, Staudinger BJ, Lippman S, Singh PK, Manoil C.** 2015. General and condition-specific essential functions of *Pseudomonas aeruginosa*. *Proc Natl Acad Sci USA* **112**:5189-5194.
48. **Turner KH, Wessel AK, Palmer GC, Murray JL, Whiteley M.** 2015. Essential genome of *Pseudomonas aeruginosa* in cystic fibrosis sputum. *Proc Natl Acad Sci USA* **112**:4110-4115.
49. **Fabian BK, Foster C, Asher AJ, Elbourne LDH, Cain AK, Hassan KA, Tetu SG, Paulsen IT.** 2021. Elucidating essential genes in plant-associated *Pseudomonas protegens* Pf-5 using transposon insertion sequencing. *J Bacteriol* **203**:e00432-20.
50. **Pechter KB, Gallagher L, Pyles H, Manoil CS, Harwood CS.** 2015. Essential genome of the metabolically versatile alphaproteobacterium *Rhodopseudomonas palustris*. *J Bacteriol* **198**:867-876.
51. **Curtis PD.** 2016. Essential genes predicted in the genome of *Rubrivivax gelatinosus*. *J Bacteriol* **198**:2244-2250.
52. **Knuth K, Niesalla H, Hueck CJ, Fuchs TM.** 2004. Large-scale identification of essential *Salmonella* genes by trapping lethal insertions. *Mol Microbiol* **51**:1729-1744.
53. **Langridge GC, Phan MD, Turner DJ, Perkins TT, Parts L, Haase J, Charles I, Maskell DJ, Peters SE, Dougan G, Wain J, Parkhill J, Turner AK.** 2009. Simultaneous assay of every *Salmonella typhi* gene using one million transposon mutants. *Genome Res* **19**:2308-2316.
54. **Barquist L, Langridge GC, Turner DJ, Phan MD, Turner AK, Bateman A, Parkhill J, Wain J, Gardner PP.** 2013. A comparison of dense transposon insertion libraries in the *Salmonella* serovars Typhi and Typhimurium. *Nucleic Acids Res* **41**:4549-4564.
55. **Deutschbauer A, Price MN, Wetmore KM, Shao W, Baumohl JK, Xu Z, Nguyen M, Tamse R, Davis RW, Arkin AP.** 2011. Evidence-based annotation of gene function in *Shewanella oneidensis* MR-1 using genome-wide fitness profiling across 121 conditions. *PLoS Genet* **7**:e1002385.
56. **Ji Y, Zhang B, Van SF, Horn, Warren P, Woodnutt G, Burnham MK, Rosenberg M.** 2001. Identification of critical staphylococcal genes using conditional phenotypes generated by antisense RNA. *Science* **293**:2266-2269.
57. **Bae T, Banger AK, Wallace A, Glass EM, Aslund F, Schneewind O, Missiakas DM.** 2004. *Staphylococcus aureus* virulence genes identified by bursa aurealis mutagenesis and nematode killing. *Proc Natl Acad Sci USA* **101**:12312-12317.
58. **Chaudhuri RR, Allen AG, Owen PJ, Shalom G, Stone K, Harrison M, Burgis TA, Lockyer M, Garcia-Lara J, Foster SJ, Pleasance SJ, Peters SE, Maskell DJ, Charles IG.** 2009. Comprehensive identification of essential *Staphylococcus aureus* genes using Transposon-Mediated Differential Hybridisation (TMDH). *BMC Genomics* **10**:291.
59. **Coe KA, Lee W, Stone MC, Komazin-Meredith G, Meredith TC, Grad YH, Walker S.** 2019. Multi-strain Tn-Seq reveals common daptomycin resistance determinants in *Staphylococcus aureus*. *PLoS Pathog* **15**:e1007862.

60. **Hooven TA, Catomeris AJ, Akabas LH, Randis TM, Maskell DJ, Peters SE, Ott S, Santana-Cruz I, Tallon LJ, Tettelin H, Ratner AJ.** 2016. The essential genome of *Streptococcus agalactiae*. *BMC Genomics* **17**:406.
61. **Shields RC, Zeng L, Culp DJ, Burne RA.** 2018. Genomewide identification of essential genes and fitness determinants of *Streptococcus mutans* UA159. *mSphere* **3**:e00031-18.
62. **Le Breton Y, Belew AT, Valdes KM, Islam E, Curry P, Tettelin H, Shirliff ME, El-Sayed NM, McIver KS.** 2015. Essential genes in the core genome of the human pathogen *Streptococcus pyogenes*. *Sci Rep* **5**:9838.
63. **Xu P, Ge X, Chen L, Wang X, Dou Y, Xu JZ, Patel JR, Stone V, Trinh M, Evans K, Kitten T, Bonchev D, Buck GA.** 2011. Genome-wide essential gene identification in *Streptococcus sanguinis*. *Sci Rep* **1**:125.
64. **Arenas J, Zomer A, Harders-Westerveen J, Bootsma HJ, De Jonge MI, Stockhofe-Zurwieden N, Smith HE, De Greeff A.** 2020. Identification of conditionally essential genes for *Streptococcus suis* infection in pigs. *Virulence* **11**:446-464.
65. **Rubin BE, Wetmore KM, Price MN, Diamond S, Shultzaberger RK, Lowe LC, Curtin G, Arkin AP, Deutschbauer A, Golden SS.** 2015. The essential gene set of a photosynthetic organism. *Proc Natl Acad Sci USA* **112**:E6634-6643.
66. **Cameron DE, Urbach JM, Mekalanos JJ.** 2008. A defined transposon mutant library and its use in identifying motility genes in *Vibrio cholerae*. *Proc Natl Acad Sci USA* **105**:8736-8741.
67. **Chao MC, Pritchard JR, Zhang YJ, Rubin EJ, Livny J, Davis BM, Waldor MK.** 2013. High-resolution definition of the *Vibrio cholerae* essential gene set with hidden Markov model-based analyses of transposon-insertion sequencing data. *Nucleic Acids Res* **41**:9033-9048.
68. **Brown CT, Hug LA, Thomas BC, Sharon I, Castelle CJ, Singh A, Wilkins MJ, Wrighton KC, Williams KH, Banfield JF.** 2015. Unusual biology across a group comprising more than 15% of domain Bacteria. *Nature* **523**:208-211.
69. **Chen SS, Williamson JR.** 2013. Characterization of the ribosome biogenesis landscape in *E. coli* using quantitative mass spectrometry. *J Mol Biol* **425**:767-779.
